# Supplementary material for: Uraemic brainstem encephalopathy mimicking ocular myasthenia: a case report
Source: Springer Nature journal article supplement (doi:10.1186/s12883-024-03626-y), 2024-04-12
Supplement: MOESM2 [file 26972100]

## Supplementary material 2

### Results of repetitive nerve stimulation

#### Repetitive Stimulation:

| Nerve                        | Potential Number | Amplitude |       |
|------------------------------|------------------|-----------|-------|
|                              |                  | Val.      | Decr. |
| Ulnar R<br>10 stimuli at 3Hz | 1                | 3.36 mV   | 0 %   |
|                              | 2                | 3.34 mV   | 1 %   |
|                              | 3                | 3.34 mV   | 1 %   |
|                              | 4                | 3.37 mV   | 0 %   |
|                              | 5                | 3.34 mV   | 1 %   |
|                              | 6                | 3.30 mV   | 2 %   |
|                              | 7                | 3.35 mV   | 0 %   |
|                              | 8                | 3.31 mV   | 1 %   |
|                              | 9                | 3.34 mV   | 1 %   |
|                              | 10               | 3.35 mV   | 0 %   |

| Nerve                         | Potential Number | Amplitude |       |
|-------------------------------|------------------|-----------|-------|
|                               |                  | Val.      | Decr. |
| Facial L<br>10 stimuli at 2Hz | 1                | 2.31 mV   | 0 %   |
|                               | 2                | 2.26 mV   | 2 %   |
|                               | 3                | 2.28 mV   | 1 %   |
|                               | 4                | 2.27 mV   | 2 %   |
|                               | 5                | 2.24 mV   | 3 %   |
|                               | 6                | 2.29 mV   | 1 %   |
|                               | 7                | 2.30 mV   | 0 %   |
|                               | 8                | 2.29 mV   | 1 %   |
|                               | 9                | 2.22 mV   | 4 %   |
|                               | 10               | 2.28 mV   | 1 %   |

| Nerve                                     | Potential Number | Amplitude |       |
|-------------------------------------------|------------------|-----------|-------|
|                                           |                  | Val.      | Decr. |
| Accessory (spinal) L<br>10 stimuli at 3Hz | 1                | 4.36 mV   | 0 %   |
|                                           | 2                | 4.38 mV   | 0 %   |
|                                           | 3                | 4.43 mV   | -2 %  |
|                                           | 4                | 4.36 mV   | 0 %   |
|                                           | 5                | 4.34 mV   | 0 %   |
|                                           | 6                | 4.53 mV   | -2 %  |
|                                           | 7                | 4.24 mV   | 3 %   |
|                                           | 8                | 4.35 mV   | 0 %   |
|                                           | 9                | 4.42 mV   | -1 %  |
|                                           | 10               | 4.53 mV   | -3 %  |

#### Conclusions:

No decremental pattern demonstrated in the RNST. However, it does not exclude myasthenia gravis.

Repetitive nerve stimulation was done in the right ulnar, left facial and left spinal accessory nerves. A decremental pattern was not observed.
